# Supplementary material for: Treatment With Endothelin-A Receptor Antagonist BQ123 Attenuates Acute Inflammation in Mice Through T-Cell-Dependent Polymorphonuclear Myeloid-Derived Suppressor Cell Activation
Source: Front Immunol. 2021 Mar 22;12:641874. doi: 10.3389/fimmu.2021.641874 (PMC8019801; doi:10.3389/fimmu.2021.641874)
Supplement: Supplementary file 2 [file Table_1.xlsx]

## Sheet: Sheet1
	Supplemental Table 1. Reagents used in this study
	Name	Cat#	Vendor	Country
	BSA	A1933-5g	Sigma	USA
	TRIzol reagent	15596-026	Invitrogen	USA
	Recombinant murine GM-CSF	415-ML-01M	R&D Systems	USA
	Mouse S100A9 DuoSet ELISA	DY2065	R&D Systems	USA
	NAC	1124220025	Millipore	USA
	L161982	SML0690-5MG	Sigma	USA
	AH6809	A1221-5MG	Sigma	USA
	NOHA	399275	Millipore	USA
	DMSO	V900090	Sigma	USA
	DTT	P001008	Amresco	USA
	Lymphoprep ™	AS1114546	Axis-Shield	USA
	Percoll	17-0891-09	GE Healthcare	Sweden
	DCFDA	D6883	Sigma	USA
	StarScript II One-step RT-PCR Kit	A212-05	Genstar	China
	2 × RealStar Green Power Mixture（with ROX II）	A314-10	Genstar	China
	DNaseI	B00218-0025	Sangon Biotech	China
	Collagenase I	17104019	Gibco	USA
	CELLTRACE CFSE CELL PROLIFERAT KIT	C34554	ThermoFisher	USA
	RPMI-1640	01-100-1ACS	BI	Israel
	FBS	04-001-1ACS	BI	Israel
	Concanavalin A	C5275	Sigma	USA
	Arginase activity detection kit	DARG-200	Bioassay	USA
	Streptavidin Microbeads	557812	BD Biosciences	USA
	RIPA Lysis Buffer	P0013B	Beyotime	China
	DCFDA	D6883	Sigma	USA
	Fix & Perm Solution	554722	BD Biosciences	USA
	DSS	216011080	MP Biomedicals	USA
	BQ123	S7883-100mg	Selleck	China
	Recombinant Mouse IL-7	CC73	novoprotein	China
	Recombinant Mouse IL-33	CG73	novoprotein	China
	Recombinant Mouse IL-2	CK24	novoprotein	China
	EasySep Ms APC Positive Slctn Kit II	17667	Stemcell	Canada
	InVivoMab anti-mouse Ly6G/Ly6C (Gr-1)	BE0075-25MG	BioXcell	USA
	InVivoMab rat IgG2a isotype control	BE0089-5MG	BioXcell	USA
	BQ123	B150-200UG	Sigma	USA
	Endothelin-1	bs-0954P-0.1mg	Bioss	China
	Concanavalin A	C2010-100MG	SIGMA	USA
	Papain	9001-73-4	SIGMA	USA
	Mouse IL-5 ELISA KIT	CME0023	4A Biotech	China
	Mouse IL-13 ELISA KIT	CME0009	4A Biotech	China
	Aspartate aminotransferase Assay Kit	C010-2-1	njjcbio	China
	Alanine aminotransferase Assay Kit	C009-2-1	njjcbio	China
	PGE2 ELISA kits	EHPGE2	Invitrogen	USA
	BCA protein assay	P0012	Beyotime Biotechnology	China
	Inhibitors of pSTAT6(AS1517499)	S8685-50mg	Selleck	China
	PMA	P-800-1mg	Sigma-Aldrich	USA
	Ionomycin	I-700-1mg	Sigma-Aldrich	USA
	Brefeldin A	B-275-1mg	Sigma-Aldrich	USA
	30% Acrylamide/Methylene Bisacrylamide	B546017-0500	Sangon Biotech	China
	Tris-HCl-SDS PH=6.8	C526034-0250	Sangon Biotech	China
	Tris-HCl-SDS PH=8.8	C526033-0250	Sangon Biotech	China
	TEMED	A610508-0100	BBI Life Science	China
	Ammonium persulphate	A600072-0025	BBI Life Science	China
